# Supplementary material
Source: PubMed Central journal article supplement (PMC4785079)

**HIF2 $\alpha$  is an essential molecular brake for postprandial hepatic glucagon response  
independent of insulin signaling**

Sadeesh K. Ramakrishnan<sup>1</sup>, Haubing Zhang<sup>1</sup>, Shogo Takahashi<sup>4</sup>, Brook Centofanti<sup>1</sup>,  
Sarvesh Perisamy<sup>1</sup>, Kevin Weisz<sup>1</sup>, Zheng Chen<sup>1</sup>, Michael D. Uhler<sup>3</sup>, Liangyou Rui<sup>1</sup>,  
Frank J. Gonzalez<sup>4</sup>, and Yatrik M. Shah<sup>1,3</sup>

**Supplement Table 1** (Related to Experimental procedure- Real-time PCR)

| Primers          | Sequence                  |
|------------------|---------------------------|
| G6pase F         | GTGTCCAGGACCCACCAATA      |
| G6pase R         | ACTGTGGGCATCAATCTCCT      |
| Pepck F          | CTGGATGAAGTTTGATGCC       |
| Pepck R          | TGTCTTCACTGAGGTGCCAG      |
| Epo F            | CATCTGCGACAGTCGAGTTCTG    |
| Epo R            | CACAACCCATCGTGACATTTTC    |
| Hif-2 $\alpha$ F | TGAGTTGGCTCATGAGTTGC      |
| Hif-2 $\alpha$ R | TATGTGTCCGAAGGAAGCTG      |
| Irs-1 F          | GGAGGATTTGCTGAGGTCAT      |
| Irs-1 R          | CTATGCCAGCATCAGCTTCC      |
| Irs-2 F          | CACAATTCCAAGCGCCACAA      |
| Irs-2 R          | CATCACCTCCTCCCAGGGTA      |
| Pgc-1 F          | TGAGGACCGCTAGCAAGTTT      |
| Pgc-1 R          | TGTAGCGACCAATCGGAAAT      |
| Pkar1 $\alpha$ F | CCCTCGAGTCAGTACGGATG      |
| Pkar1 $\alpha$ R | GCATTCCTTCGGGAATACTTT     |
| Pkar2 $\alpha$ F | CCTCCTCTTCTTCATCAGGG      |
| Pkar2 $\alpha$ R | GAGTGACTCGGACTCGGAAG      |
| Pkar2 $\beta$ F  | GATCATCGGTTTTGGGATGT      |
| Pkar2 $\beta$ R  | ATAAACCGGTTCAAGGCG        |
| Pkac $\alpha$ F  | ATTCTGAGAAGGGGTCTCCC      |
| Pkac $\alpha$ R  | AAGAAGGGCAGCGAGCAG        |
| Pkac $\beta$ F   | TCCTCAAGCCCAGCATTACT      |
| Pkac $\beta$ R   | CAAGAAAGGCAGCGAAGTG       |
| PDE1B F          | TGCAGTAGAGTATGTGGGGC      |
| PDE1B R          | AGAAACCCAAGTTCCGAAGC      |
| PDE2A F          | CCCCATCACTCCTCATCATC      |
| PDE2A R          | AGAACCAGCCATTGCTCTTG      |
| PDE3A F          | CGAGGACCAAGGAAGAGATTC     |
| PDE3A R          | ATGAGCTGCTCCCTGGGTAT      |
| PDE3B F          | ATCGCCTCTTGGTCTGCCAG      |
| PDE3B R          | GCCTTCTGTCCATCTCAAATGTAGG |
| PDE4A F          | CAGAACCTCAGCAAGCGCCA      |
| PDE4A R          | CCTGAGGACCTGGATACGG       |
| PDE4C F          | CGGACTGAGCGTCTAGGAGA      |
| PDE4C R          | GGGACACAGAGAAACCTTGG      |
| PDE4D F          | TGCTCAGGTCTTGGCTAGCCTGC   |
| PDE4D R          | TCCTCCAGGGTCTCGCTGGC      |
| PDE7A F          | GTGTTAATCAGCCGTTTCTTATT   |
| PDE7A R          | CAAAGCACCTATCTGAGCCT      |
| PDE7B F          | TCAATGAATGGGTAGGAGCC      |
| PDE7B R          | GAGCCCTGAACAGAGTGTCA      |
| PDE10A F         | AAATTATATGGTTTGACGGATG    |
| PDE10A R         | ACAGTCTCTGCACTAACAC       |

## Supplement figure legends

Supplement Figure 1 *Progressive improvement in glucose and glucagon tolerance is independent of IRS-2 levels at 1-week following VHL disruption (Related to Figure 1).*

(A) Glucose tolerance test in mice at two week following disruption of VHL in liver ( $Vhl^{LivKO}$ ). \* $p < 0.05$  compared to  $Vhl^{F/F}$ . Five mice were assessed per group. (B) qPCR analysis of *Irs-1* and *Irs-2* in the livers of  $Vhl^{F/F}$  and  $Vhl^{LivKO}$  at one and two week following disruption of VHL in liver ( $Vhl^{LivKO}$ ). Expression was normalized to  $\beta$ -actin mRNA. Each bar represents the mean value  $\pm$  S.E.M. \* $p < 0.05$  compared to  $Vhl^{F/F}$ . (C) Western blot analysis of IRS-2 in primary hepatocytes extracted at 1-week following VHL disruption or (D) in livers at 7-, 14- and 30-days following VHL disruption. Three mice assessed per group. (E) Western blot analysis of pFOXO1 and FOXO1 in cytosolic and nuclear fraction from  $Vhl^{LivKO}$  at 1-week following VHL disruption. Three mice assessed per group. (F) Glucagon tolerance test in mice at two week following disruption of VHL in liver ( $Vhl^{LivKO}$ ). Four to five mice were assessed per group. \* $p < 0.001$  compared to  $Vhl^{F/F}$ . Four to five mice were assessed per group.

Supplement Figure 2 *Decreased gluconeogenesis in  $Vhl^{LivKO}$  mice could not be restored by PGC-1 overexpression or STAT-3 inhibition (Related to Figure 2).* (A) Pyruvate tolerance test in mice at two weeks following disruption of VHL in liver ( $Vhl^{LivKO}$ ). \* $p < 0.05$ , \*\* $p < 0.01$ , \*\*\* $p < 0.001$  compared to  $Vhl^{F/F}$ . Four to five mice were assessed per group. (B) Western blot analysis of insulin stimulated AKT phosphorylation in primary hepatocytes isolated from  $Vhl^{F/F}$  and  $Vhl^{LivKO}$  mice that were pretreated for 1-hour with 50 nM LY294002 or 50 nM MK-2206. (C) qPCR analysis of PGC-1 in the primary

hepatocytes of *Vhl*<sup>F/F</sup> and *Vhl*<sup>LivKO</sup> mice (D) *G6pase* in the primary hepatocytes of *Vhl*<sup>F/F</sup> and *Vhl*<sup>LivKO</sup> mice infected with recombinant adenovirus expressing PGC-1 $\alpha$  (Ad-PGC-1 $\alpha$ ). (E) Western blot analysis for pSTAT3 and STAT3 in primary hepatocytes of *Vhl*<sup>F/F</sup> and *Vhl*<sup>LivKO</sup> mice. (F) Western blot analysis for pSTAT3 and STAT3 in primary hepatocytes of *Vhl*<sup>LivKO</sup> mice treated with the STAT3 inhibitor (STAT3i), 100  $\mu$ M S3i-201 (Apexbio, Houston, TX) for 2-hours. (G) qPCR analysis of *G6pase* and *Pepck* in the primary hepatocytes of *Vhl*<sup>F/F</sup> and *Vhl*<sup>LivKO</sup> treated with STAT3i for 2-hours. Gene expression studies are done in triplicates and expression was normalized to  $\beta$ -actin mRNA. Each bar represents the mean value  $\pm$  S.E.M. \*\*\*p < 0.001 compared to *Vhl*<sup>F/F</sup>. ###p < 0.05 compared to untreated.

Supplement Figure 3 *Improved glucose homeostasis and glucagon resistance in *Vhl*<sup>LivKO</sup> mice is HIF-2 $\alpha$  dependent (Related to Figure 3)*. (A) Fed and fasting glucose monitored in WT (*Vhl/Hif-1 $\alpha$* <sup>F/F</sup>) and mice with compound disruption of VHL in liver (*Vhl/Hif-1 $\alpha$* <sup>LivKO</sup>). (B) Glucose, (C) glucagon and (D) pyruvate tolerance test performed in WT and *Vhl/Hif-1 $\alpha$* <sup>LivKO</sup> mice. \*\*p < 0.01, \*\*\*p < 0.001 compared to *Vhl/Hif-1 $\alpha$* <sup>F/F</sup>. Seven to eight mice were assessed per group.

Supplement Figure 4 *Decrease in gluconeogenic genes after refeeding is associated with decreased CREB phosphorylation (Related to Figure 4)*. (A) Serum insulin levels measured in mice fed, overnight fasted or overnight fasted and refed for 30 minutes to 2-hours. (B) Western blot analysis in whole cell lysates of mice that were either fasted overnight or refed for 30 minutes to 2-hours. (C) qPCR analysis of *G6pase* and *Pepck*

mRNA in mice that were either fed, overnight fasted or refed for 30 minutes to 2-hours. Expression was normalized to  $\beta$ -actin mRNA. Each bar represents the mean value  $\pm$  S.E.M. \* $p < 0.05$ , \*\*\* $p < 0.001$  compared to fasted mice. Five mice were assessed per group.

Supplement figure 5 *Abrogation of glucagon signaling in  $Vhl^{LivKO}$  mice is due to increased hydrolysis of cAMP (Related to Figure 5)*. (A) G6pase luciferase assays in primary hepatocytes of  $Vhl^{F/F}$  and  $Vhl^{LivKO}$  mice that were infected with Ad-G6pase-luciferase virus and then pre-treated with 0.2  $\mu$ M Okadaic acid for 2-hours, followed by treatment with 50 nM glucagon. Luciferase assays were performed in triplicates and activities normalized to protein content. Each bar represents the mean value  $\pm$  S.E.M. # $p < 0.05$ , ### $p < 0.001$  compared to untreated. \*\*\* $p < 0.001$  compared to  $Vhl^{F/F}$ . (B) Western blot analysis of pCREB in primary hepatocyte lysate incubated invitro with recombinant PKA (2500U/ml; NewEngland Biolabs) for 30 minutes at 30C. (C) qPCR analysis of PKA subunit mRNA in the primary hepatocytes of  $Vhl^{F/F}$  and  $Vhl^{LivKO}$  mice. (D) Western blot analysis of PKA subunits in the primary hepatocyte lysates from  $Vhl^{F/F}$  and  $Vhl^{LivKO}$  mice. (E) Immunostaining for PKA-C in the primary hepatocytes from  $Vhl^{F/F}$  and  $Vhl^{LivKO}$  mice that were treated with 50 nM glucagon for 30 minutes. (F) Western blot analysis for PKA-C in the nuclear lysates of  $Vhl^{F/F}$  and  $Vhl^{LivKO}$  mice. (G) Co-immunoprecipitation with PKA-C antibody in the primary hepatocytes from  $Vhl^{F/F}$  and  $Vhl^{LivKO}$  mice that were treated with 50 nM glucagon for 30 minutes and then probed for PKA-C and CREB. (H) qPCR analysis of AKAP-12 and Syk in the primary hepatocytes of  $Vhl^{F/F}$  and  $Vhl^{LivKO}$  mice. (I) Western blot analysis for AKAP-12 in the primary

hepatocytes from *Vhl*<sup>F/F</sup> and *Vhl*<sup>LivKO</sup> mice. (J) qPCR analysis to assess glucagon induced *G6pase* and *Pepck* in the primary hepatocytes of *Vhl*<sup>F/F</sup> and *Vhl*<sup>LivKO</sup> mice that were pre-treated with Piceatannol (Syk inhibitor) or PMA (AKAP inhibitor) for 2-hours. qPCR analysis for *Pepck* in the primary hepatocytes of *Vhl*<sup>F/F</sup> and *Vhl*<sup>LivKO</sup> mice that were treated with (K) forskolin or (L) 200  $\mu$ M 8-br-cAMP for 2-hours. (M) Western blot analysis for p-PKA substrate antibody in the primary hepatocytes from *Vhl*<sup>F/F</sup> and *Vhl*<sup>LivKO</sup> mice that were treated with 200  $\mu$ M 8-br-cAMP for 30 minutes. Gene expression studies are done in triplicated and expression was normalized to  $\beta$ -actin. Each bar represents the mean value  $\pm$  S.E.M. #p < 0.05, ###p < 0.001 compared to untreated. \*p < 0.05, \*\*\*p < 0.001 compared to *Vhl*<sup>F/F</sup>. (N) Glucagon stimulated *Pepck* mRNA in *Vhl*<sup>F/F</sup> and *Vhl*<sup>LivKO</sup> primary hepatocytes pre-treated with 1 mM IBMX for one hour. (O) qPCR analysis for glucagon induced *G6pase* expression in the primary hepatocytes of *Vhl*<sup>LivKO</sup> mice that were pre-treated with 20  $\mu$ M Bay-60-7550 (PDE2), 20  $\mu$ M Milrinone (PDE3), and 250  $\mu$ M Papaverine (PDE10) for 2-hours. qPCR analysis of PDEs in the primary hepatocytes of (P) *Vhl*<sup>F/F</sup> and *Vhl*<sup>LivKO</sup> mice or (Q) *Vhl/Hif2 $\alpha$* <sup>F/F</sup> and *Vhl/Hif2 $\alpha$* <sup>LivKO</sup> mice. \*p < 0.05 compared to *Vhl*<sup>F/F</sup> or *Vhl/Hif2 $\alpha$* <sup>F/F</sup>. Gene expression studies are done in triplicates and expression was normalized to  $\beta$ -actin mRNA. Each bar represents the mean value  $\pm$  S.E.M. \*p < 0.05, \*\*\*p < 0.001 compared to *Vhl*<sup>F/F</sup>. # p < 0.05, ###p < 0.001 compared to Vehicle, \$p < 0.05, \$\$\$p < 0.001 are IBMX treated compared to their untreated controls. (R) Western blot analysis of PDE4D in liver lysates of *Vhl*<sup>F/F</sup> and *Vhl*<sup>LivKO</sup> mice. Experiments using primary hepatocytes were done in triplicates and repeated at least three times.

Supplement Figure 6 *Global change in PDEs results in blunted glucagon signaling in  $Vhl^{LivKO}$  mice (Related to Figure 6).* (A) Glucagon stimulated *G6pase* expression in primary hepatocytes of  $Vhl^{F/F}$  and  $Vhl^{LivKO}$  mice infected with 100 MOI Adeno-GFP or Adeno-MEK1DN virus for 48 hours. #####,  $p < 0.0001$  compared to no glucagon; \*\*\*\*,  $p < 0.0001$  compared to  $Vhl^{F/F}$ ; \$,  $p < 0.05$  compared to Ad-GFP; \$\$,  $p < 0.01$  compared to Ad-GFP. (B) Glucose production in hepatocytes pretreated with 10  $\mu$ M SU6656 for 16-hours and then treated with glucagon for 4-hours. Each bar represents the mean value  $\pm$  S.E.M. \*,  $p < 0.01$  compared to  $Vhl^{F/F}$ ; ##,  $p < 0.001$  compared to no glucagon; ^,  $p < 0.05$  compared to substrate. (C) Western blot analysis of p42/p44 ERK phosphorylation in liver lysates from mice with compound disruption of VHL/ARNT ( $Vhl/Arnt^{LivKO}$ ). (D) Blood glucose at fed state and (E) qPCR analysis for *G6pase* and *Pepck* in the livers of  $Vhl/Arnt^{LivKO}$  mice. Four mice were used per group and experiments with primary hepatocytes were done in triplicates and repeated at least three times.

Supplement Figure 7 *Insulin signaling in STZ treated mice (Related to Figure 7).* (A) Serum insulin levels assessed in STZ treated mice. \* $p < 0.05$  compared to untreated mice. (B) Co-immunostaining for insulin and glucagon performed in the pancreas of Vehicle or STZ treated mice. (C) Serum glucagon level and (D) Insulin:glucagon ratio assessed in STZ treated mice. Five to seven mice were assessed per group. \* $p < 0.05$ , \*\*\* $p < 0.001$  compared to  $Vhl^{LivKO}$  mice.

Supplement Figures

Figure S1

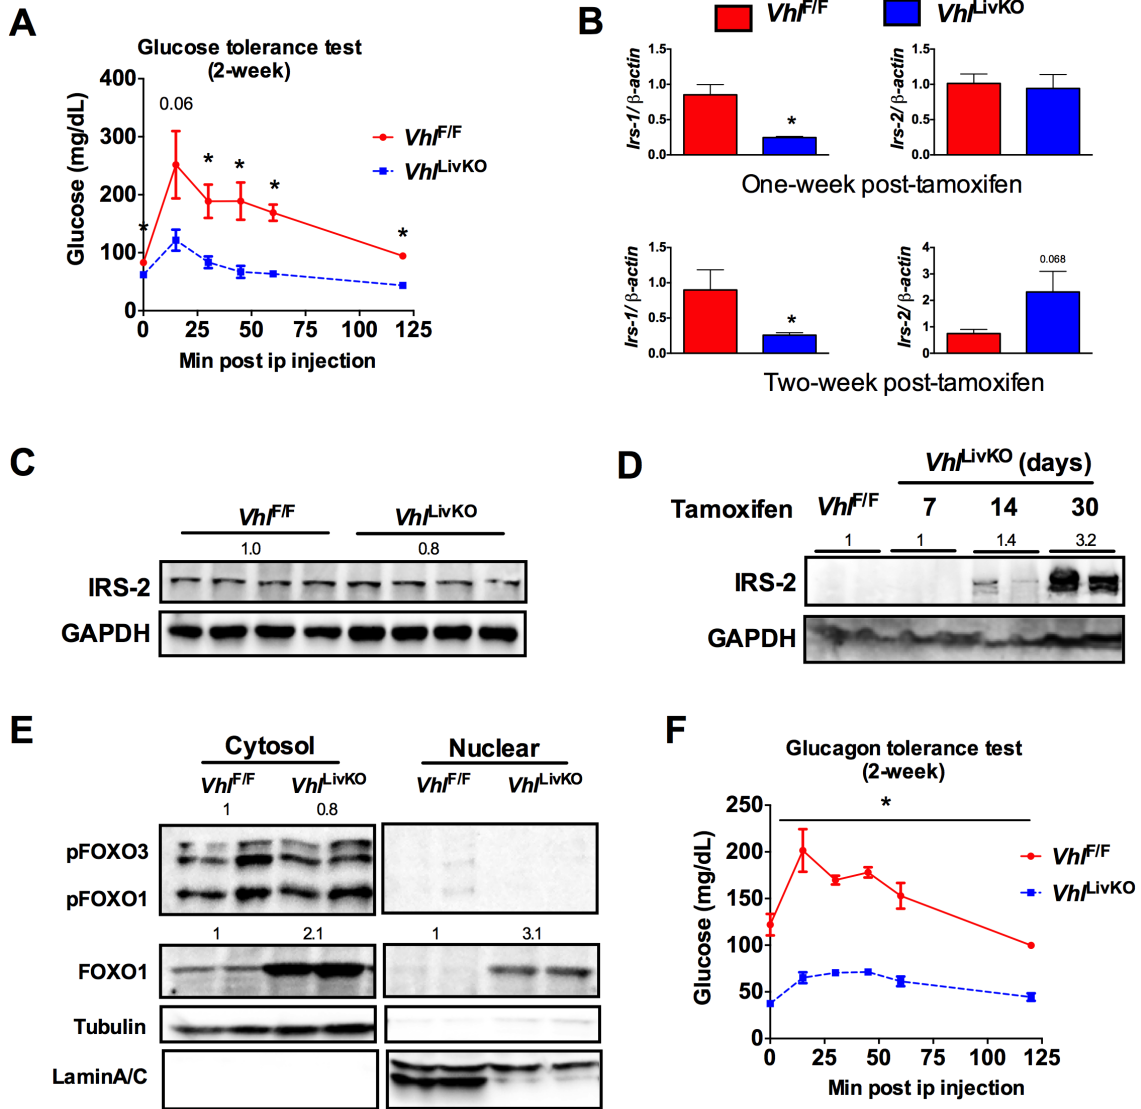



# Figure S2

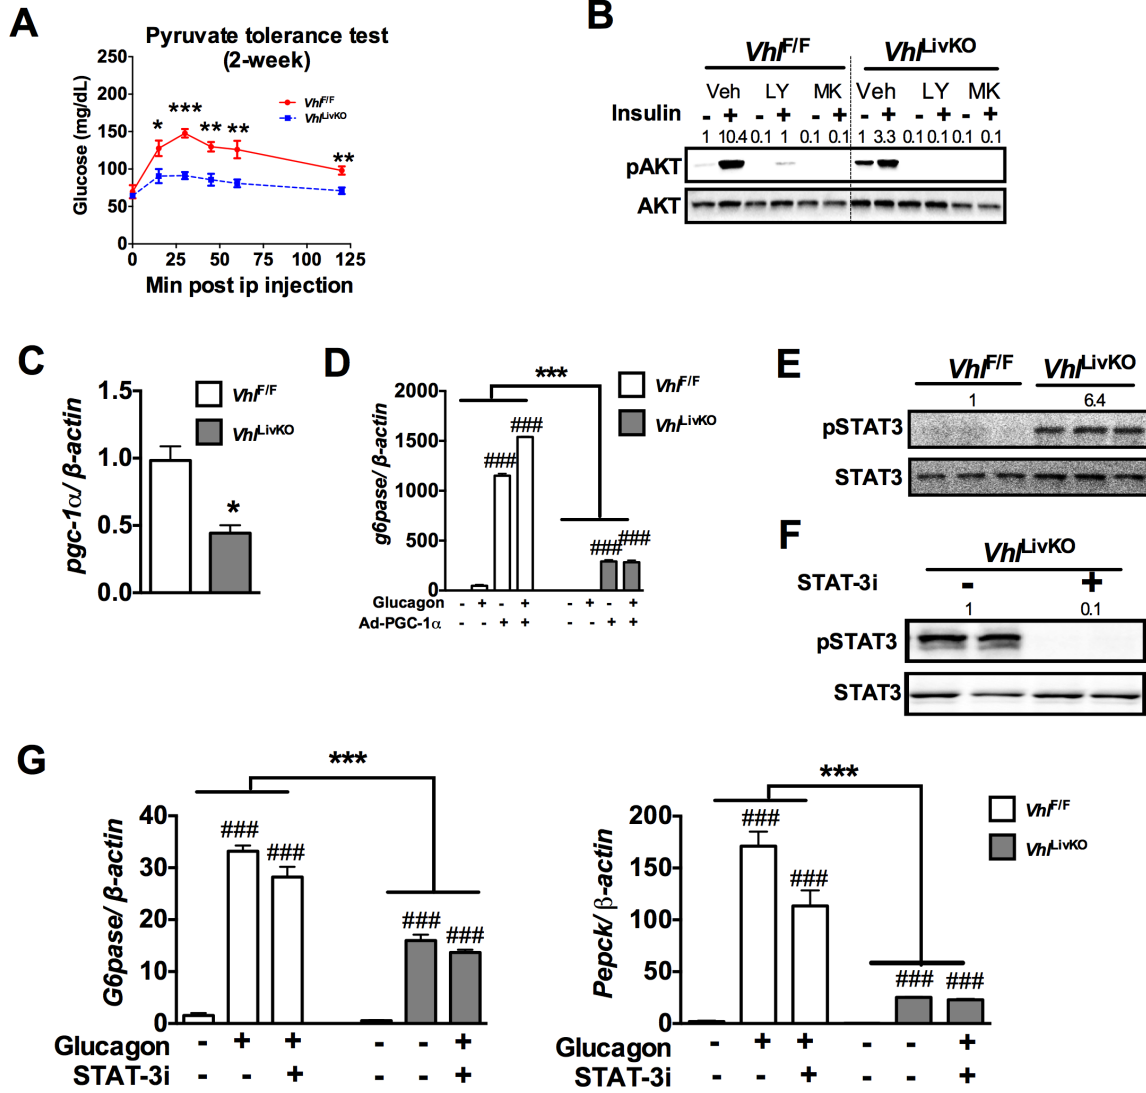

**Figure S3**

**A**

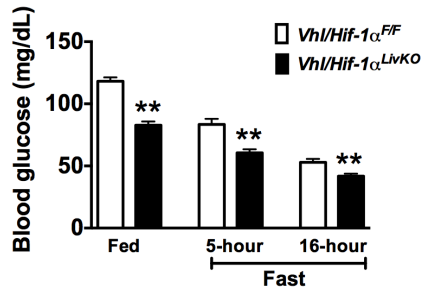

**B**

**Glucose tolerance test**

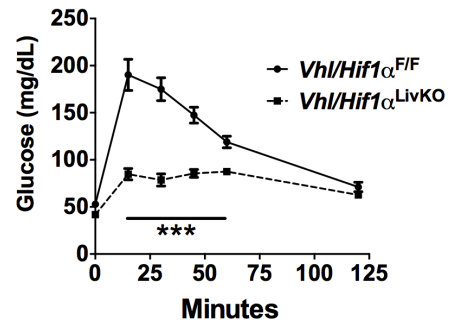

**C**

**Glucagon tolerance test**

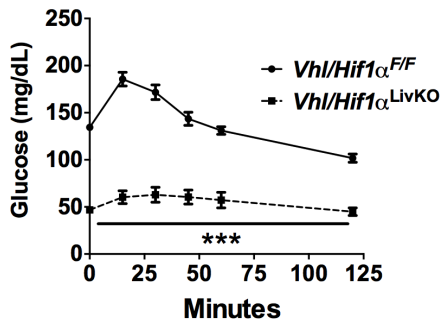

**D**

**Pyruvate tolerance test**

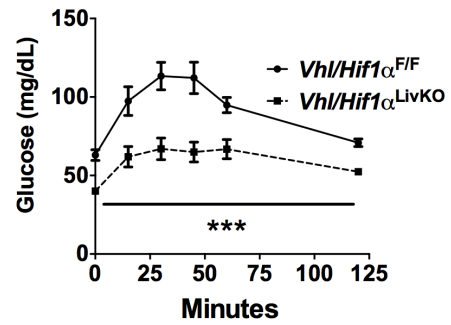

**Figure S4**

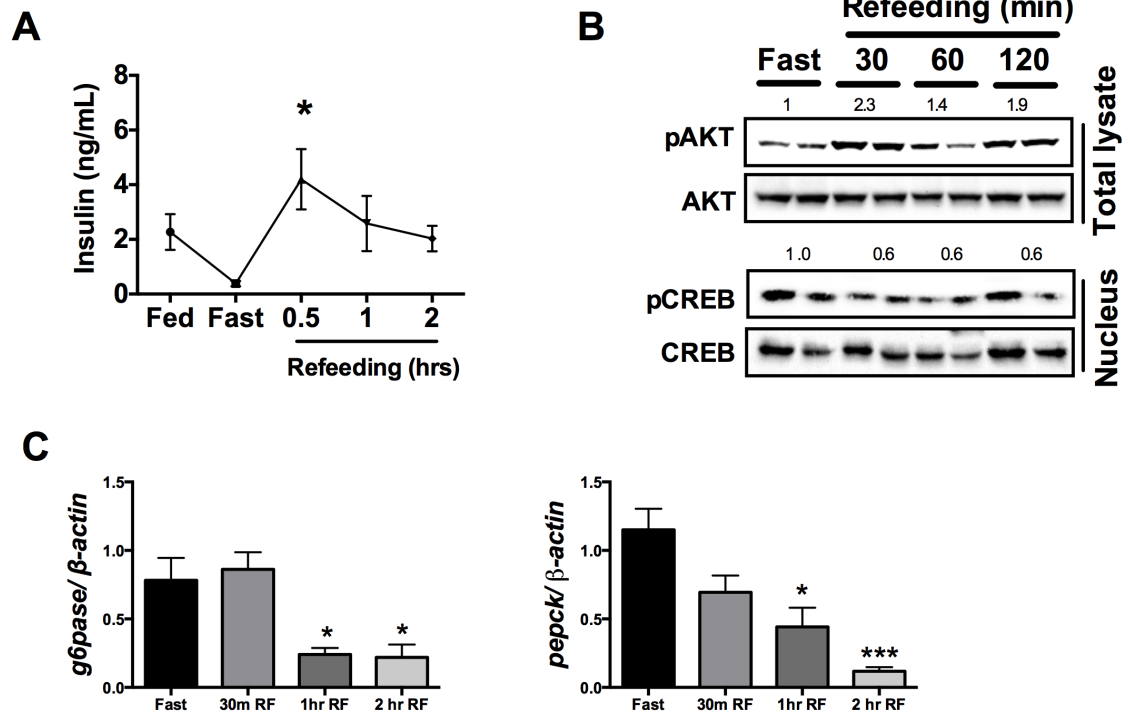

**Figure S5**

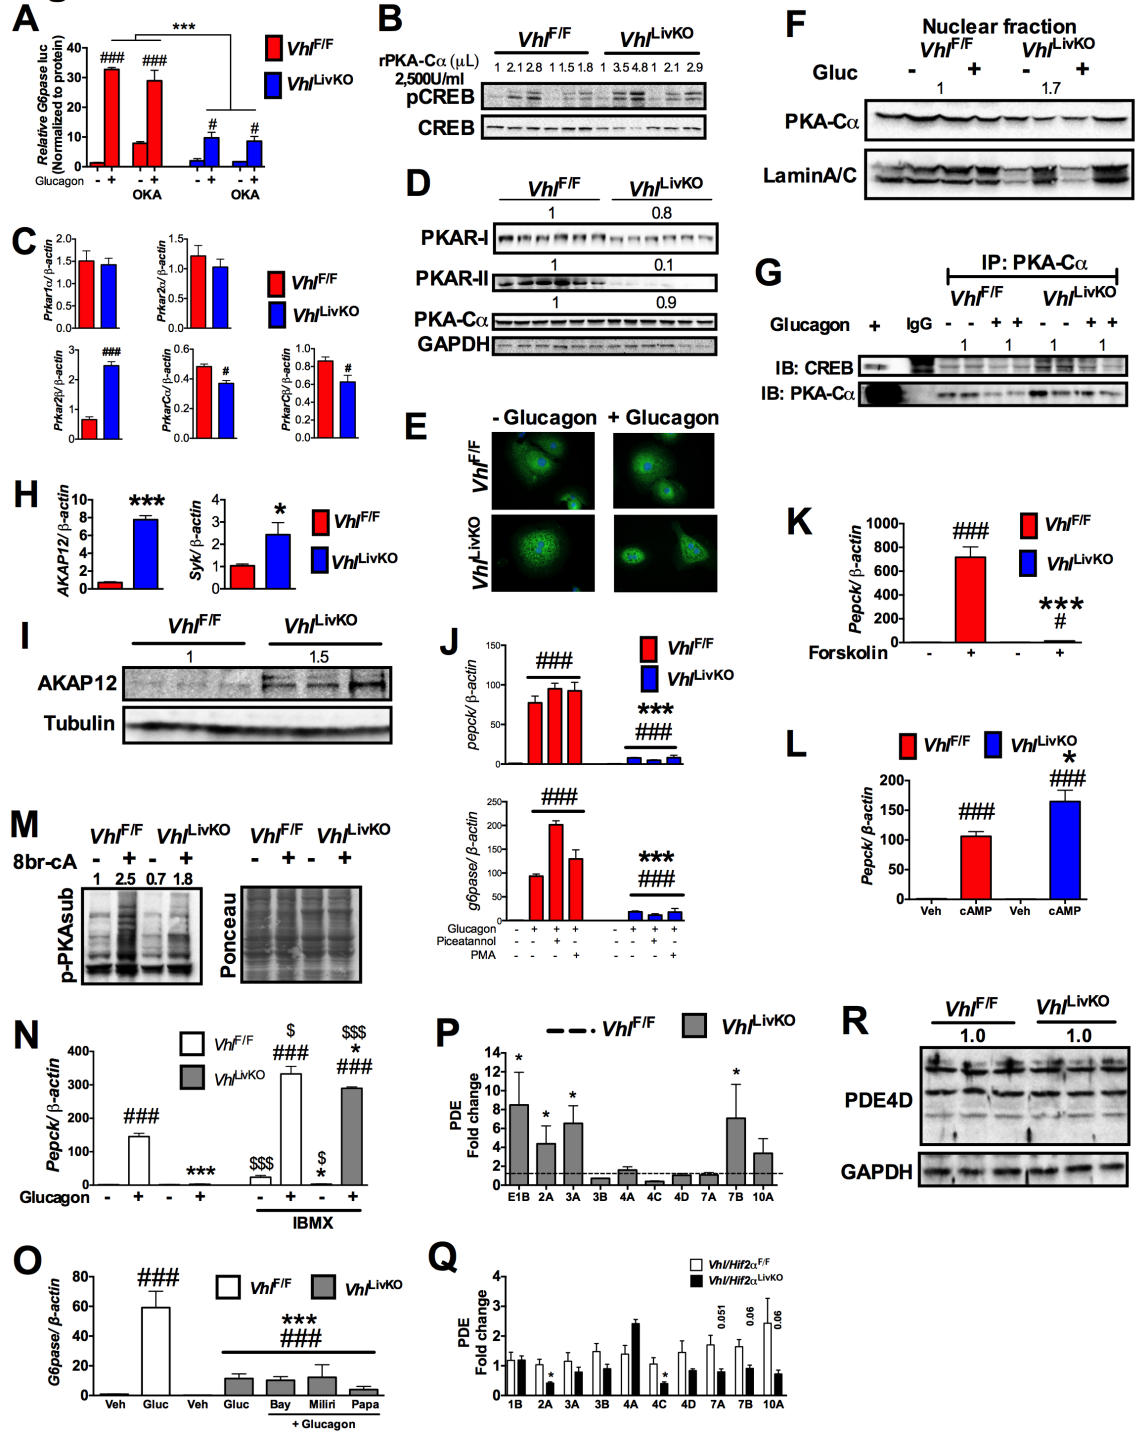

**Figure S6**

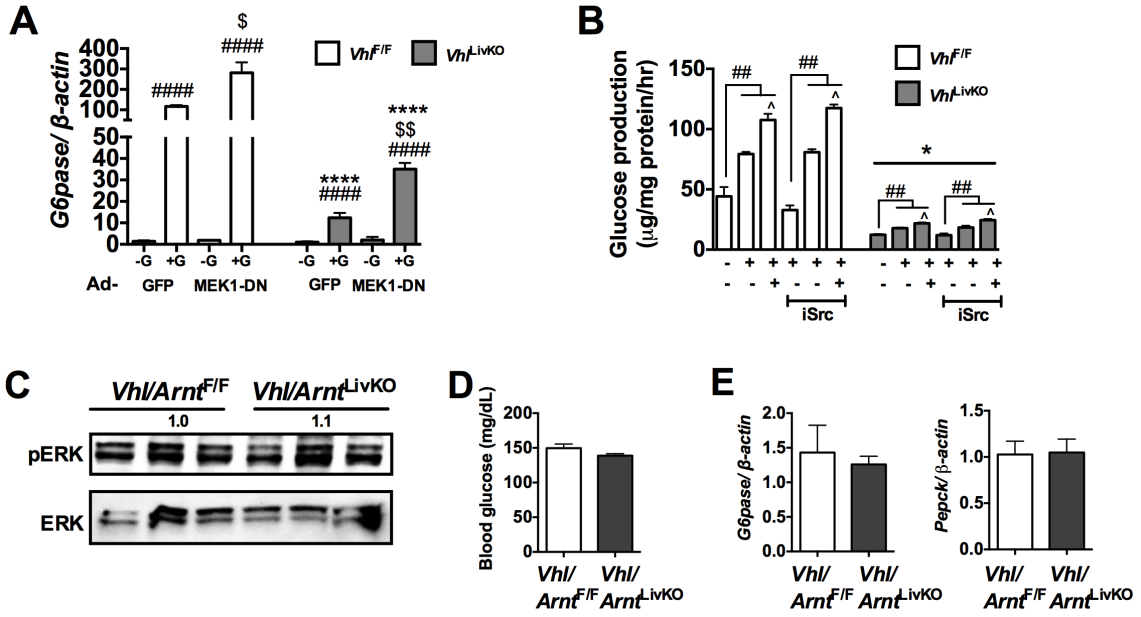

**Figure S7**

**A**

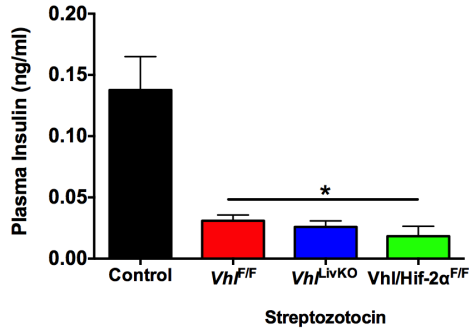

**B**

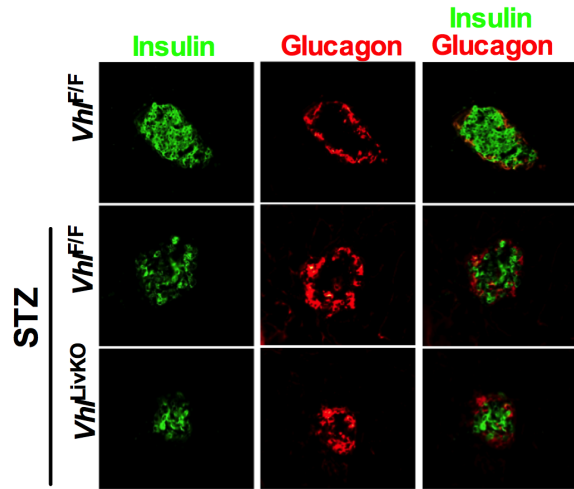

**C**

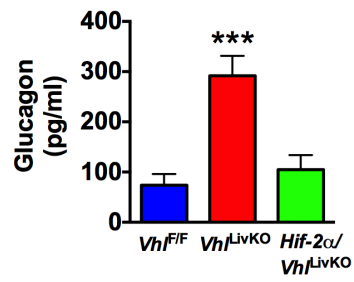

**D**

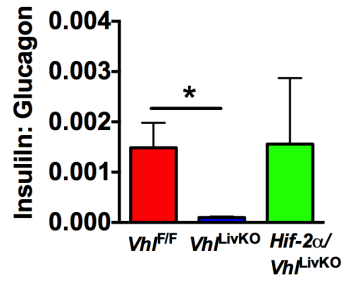

Supplement: NIHMS750648-supplement-1.pdf [file NIHMS750648-supplement-1.pdf]
